# Supplementary material for: Tetrathiafulvalene mono- and bis-1,2,3-triazole precursors by click chemistry: structural diversity and reactivity
Source: Royal Society of Chemistry journal article supplement (doi:10.1039/c4ob00148f), 2014-01-01
Supplement: c4ob00148f1.pdf [file c4ob00148f1.pdf]

**Tetrathiafulvalene mono- and bis-1,2,3-triazole precursors by click chemistry: structural diversity and reactivity**

Thomas Biet and Narcis Avarvari\*

**SUPPORTING INFORMATION**

## X-Ray structures

### Compound 2

**Table S1.** Selected lengths (Å) and angles (°) for **2**

| Distances (Å) | Torsion Angle (°) (calc) | Dihedral Angle between two planes(°) (calc)                    |
|---------------|--------------------------|----------------------------------------------------------------|
| C(3)-C(4)     | 1.260(4)                 | C(6)-C(5)-C(7)-C(8) 6.32                                       |
| S-C int.      | 1.702(4)                 | C(6)-C(5)-C(7)-N(1) 5.93                                       |
| C(1)-C(2)     | 1.304(5)                 | S(3)-C(4)-S(4)-C(5)-C(6) &<br>C(7)-N(3)-N(1)-N(2)-C(8)<br>6.00 |
| C(5)-C(6)     | 1.319(5)                 |                                                                |
| C(7)-C(8)     | 1.348(5)                 |                                                                |
| C(.)-N(.)     | 1.274(5)                 |                                                                |
| N(1)-N(2)     | 1.347(4)                 |                                                                |
| N(2)-N(3)     | 1.204(4)                 |                                                                |

Intermolecular contacts: S1-S1: 3.51 Å; N2-H6 : 2.83 Å; N3-H6 : 2.84 Å; N3-H13A: 2.89 Å.

## Compound 5

**Table S2.** Crystal Data and Structure Refinement for 5.

|                                                              |                                                                 |
|--------------------------------------------------------------|-----------------------------------------------------------------|
| empirical formula                                            | C <sub>18</sub> H <sub>24</sub> S <sub>4</sub> Si <sub>2</sub>  |
| fw                                                           | 424.79                                                          |
| <i>T</i> (K)                                                 | 293(2)                                                          |
| wavelength (Å)                                               | 0.71073                                                         |
| cryst syst                                                   | triclinic                                                       |
| space group                                                  | <i>P</i> -1                                                     |
| unit cell dimens                                             |                                                                 |
| <i>a</i> (Å)                                                 | 6.3081 (14)                                                     |
| <i>b</i> (Å)                                                 | 8.1474 (16)                                                     |
| <i>c</i> (Å)                                                 | 22.670 (5)                                                      |
| $\alpha$ (deg)                                               | 94.79 (3)                                                       |
| $\beta$ (deg)                                                | 96.73 (2)                                                       |
| $\gamma$ (deg)                                               | 92.57 (2)                                                       |
| <i>V</i> (Å <sup>3</sup> )                                   | 1151.3 (4)                                                      |
| <i>Z</i>                                                     | 2                                                               |
| <i>D<sub>c</sub></i> (g cm <sup>-3</sup> )                   | 1.225                                                           |
| abs coeff (mm <sup>-1</sup> )                                | 0.516                                                           |
| <i>F</i> (000)                                               | 448                                                             |
| cryst size (mm <sup>3</sup> )                                | 0.5 × 0.1 × 0.02                                                |
| $\theta$ range for data collection (deg)                     | 3.87–22.99                                                      |
| limiting indices                                             | −6 ≤ <i>h</i> ≤ 6,<br>−8 ≤ <i>k</i> ≤ 8,<br>−23 ≤ <i>l</i> ≤ 24 |
| reflns collected                                             | 12528                                                           |
| indep reflns                                                 | 3148                                                            |
| completeness (%) to $\theta = 25.59^\circ$                   | 98.9                                                            |
| abs correction                                               |                                                                 |
| refinement method                                            | full-matrix least squares on <i>F</i> <sup>2</sup>              |
| data/restraints/param                                        | 3148/0/217                                                      |
| GOF on <i>F</i> <sup>2</sup>                                 | 1.072                                                           |
| final <i>R</i> indices [ <i>I</i> > 2 $\sigma$ ( <i>I</i> )] | <i>R</i> 1 = 0.0555, <i>wR</i> 2 = 0.0943                       |
| <i>R</i> indices (all data)                                  | <i>R</i> 1 = 0.1165, <i>wR</i> 2 = 0.1139                       |
| largest diff. peak and hole (e Å <sup>-3</sup> )             | 0.305 and −0.256                                                |

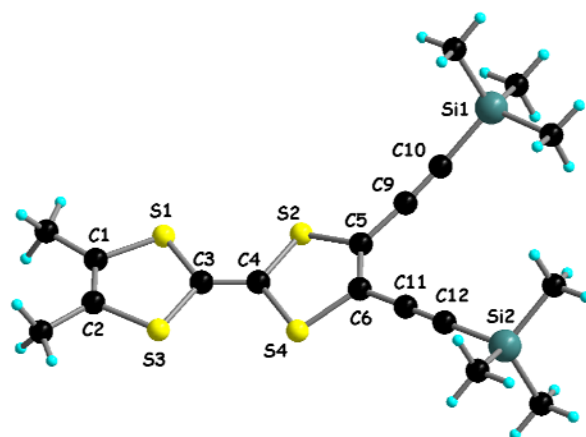

**Fig. S1** Molecular structure of 5.

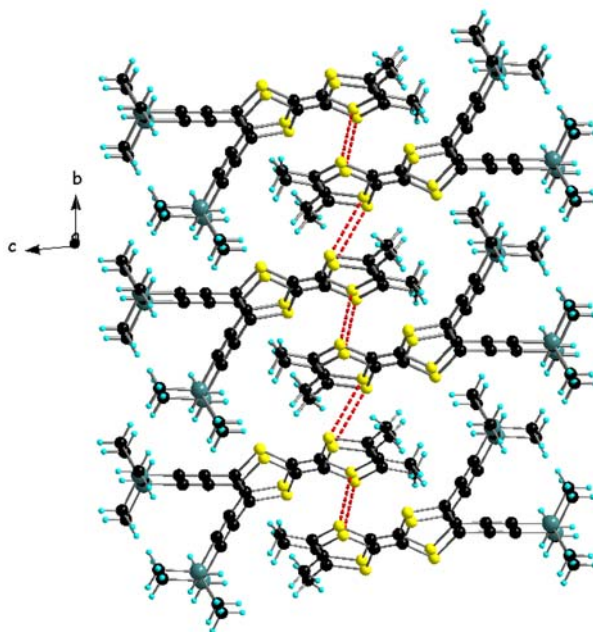

**Fig. S2** Packing of molecules in the structure of **5** with an emphasis on the S...S contacts.

**Table S3.** Selected lengths (Å) and angles (°) for **5**

| Distances (Å) | Torsion Angle (°) (calc) | Dihedral Angle between two planes(°) (calc)      |
|---------------|--------------------------|--------------------------------------------------|
| C(3)-C(4)     | 1.344(7)                 | S(3)-C(4)-S(4) &<br>S(3)-S(4)-C(5)-C(6)<br>22.62 |
| S-C int.      | 1.756(5)                 |                                                  |
| C(1)-C(2)     | 1.346(8)                 |                                                  |
| C(5)-C(6)     | 1.340(7)                 |                                                  |
| C(7)-C(9)     | 1.205(7)                 |                                                  |
| C(8)-C(10)    | 1.189(7)                 |                                                  |
| C(9)-Si(2)    | 1.828(6)                 |                                                  |
| C(10)-Si(1)   | 1.848(7)                 |                                                  |

Intermolecular contacts: S1-S1: 3.89 Å; S3-S3: 3.90 Å.

Compound **8**

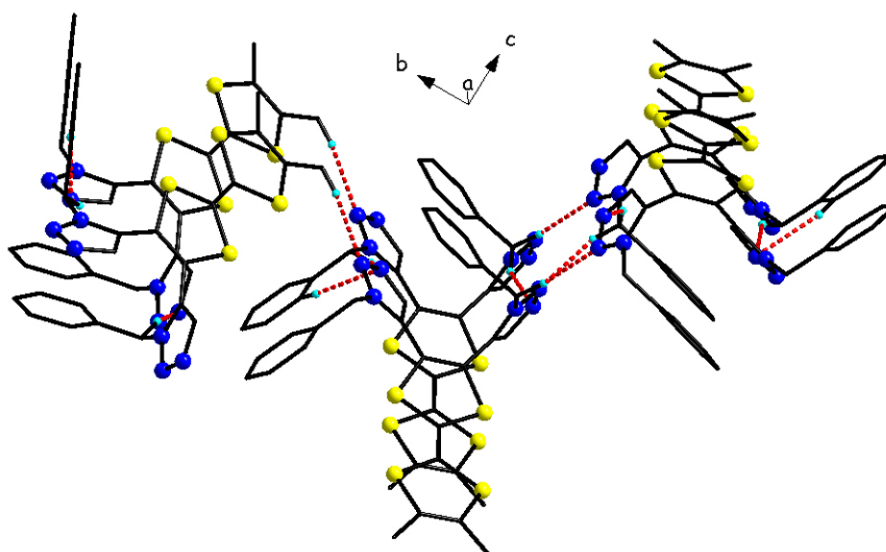

**Fig. S3** Packing of molecules in the structure of **8** with an emphasis on the N...H contacts.

**Table S4.** Selected lengths (Å) and angles (°) for **8**

| Distances (Å) | Torsion Angle (°) (calc) | Dihedral Angle between two planes(°) (calc) |
|---------------|--------------------------|---------------------------------------------|
| C(3)-C(4)     | 1.334(5)                 | C(6)-C(5)-C(7)-C(8) 87.13                   |
| S-C int.      | 1.757(4)                 | C(6)-C(5)-C(7)-N(1) 87.66                   |
| C(1)-C(2)     | 1.322(6)                 |                                             |
| C(5)-C(6)     | 1.347(5)                 | C(5)-C(6)-C(9)-C(10) 37.66                  |
| C(7)-C(8)     | 1.367(6)                 | C(5)-C(6)-C(9)-N(4) 41.45                   |
| C(.)-N(.)     | 1.346(6)                 |                                             |
| N(1)-N(2)     | 1.339(5)                 |                                             |
| N(2)-N(3)     | 1.301(5)                 |                                             |
| C(9)-C(10)    | 1.372(6)                 |                                             |
| C(.)-N(.)     | 1.350(5)                 |                                             |
| N(4)-N(5)     | 1.346(5)                 |                                             |
| N(5)-N(6)     | 1.307(5)                 |                                             |

Intermolecular contacts: N2-H13A : 2.43 Å; N6-H20B : 2.68 Å; N6-H26 : 2.59 Å; N5-H11A: 2.69 Å, N3-H13B: 2.82 Å.

## Compound 9

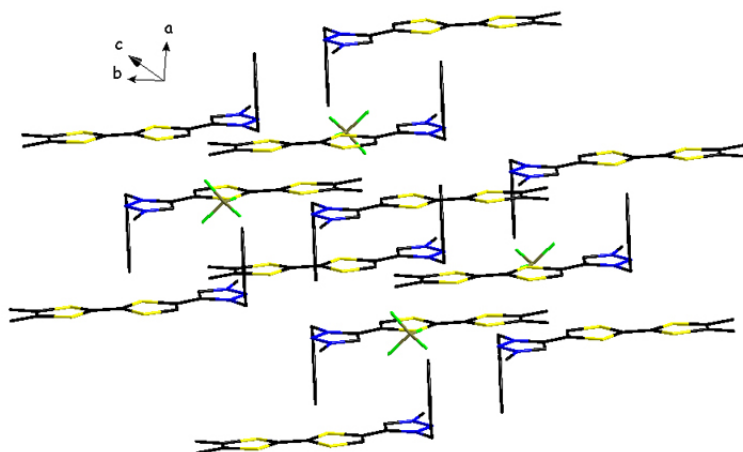

**Fig. S4** Packing of molecules in the structure of **9**.

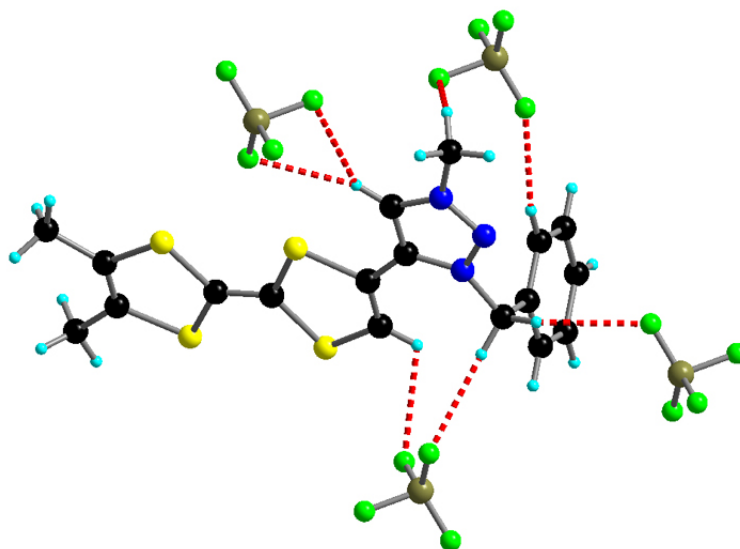

**Fig. S5** F...H hydrogen bonding in the structure of **9**.

**Table S5.** Selected lengths (Å) and angles (°) for **9**

| Distances (Å) | Torsion Angle (°) (calc) |                     | Dihedral Angle between two planes(°) (calc) |
|---------------|--------------------------|---------------------|---------------------------------------------|
| C(3)-C(4)     | 1.351(4)                 | C(6)-C(5)-C(7)-C(8) | 1.62                                        |
| S-C int.      | 1.754(3)                 | C(6)-C(5)-C(7)-N(1) | 3.25                                        |
| C(1)-C(2)     | 1.332(5)                 |                     | 2.29                                        |
| C(5)-C(6)     | 1.339(5)                 |                     |                                             |
| C(7)-C(8)     | 1.375(5)                 |                     |                                             |
| C(.)-N(.)     | 1.356(4)                 |                     |                                             |
| N(1)-N(2)     | 1.326(4)                 |                     |                                             |
| N(2)-N(3)     | 1.306(4)                 |                     |                                             |
| C(18)-N(3)    | 1.468(5)                 |                     |                                             |

Intermolecular contacts: F2-H6 : 2.63 Å; F4-H11A : 2.51 Å; H8-F1 : 2.49 Å; H8-F4 : 2.53 Å; H11B-F3 : 2.55 Å; H13-F3 : 2.39 Å; H18C-F1 : 2.62 Å.

**Electrochemical studies.** Cyclic voltammetry measurements were performed using a three-electrode cell equipped with a platinum millielectrode of 0.126 cm<sup>2</sup> area, an Ag/Ag<sup>+</sup> pseudo-reference and a platinum wire counter-electrode. The potential values were then re-adjusted with respect to the saturated calomel electrode (SCE). The electrolytic media involved a 0.1 mol.L<sup>-1</sup> solution of (*n*-Bu)<sub>4</sub>NPF<sub>6</sub> in CH<sub>2</sub>Cl<sub>2</sub>. All experiments have been performed at room temperature at 0.1 V·s<sup>-1</sup>. Experiments have been carried out with an EGG PAR 273A potentiostat with positive feedback compensation.

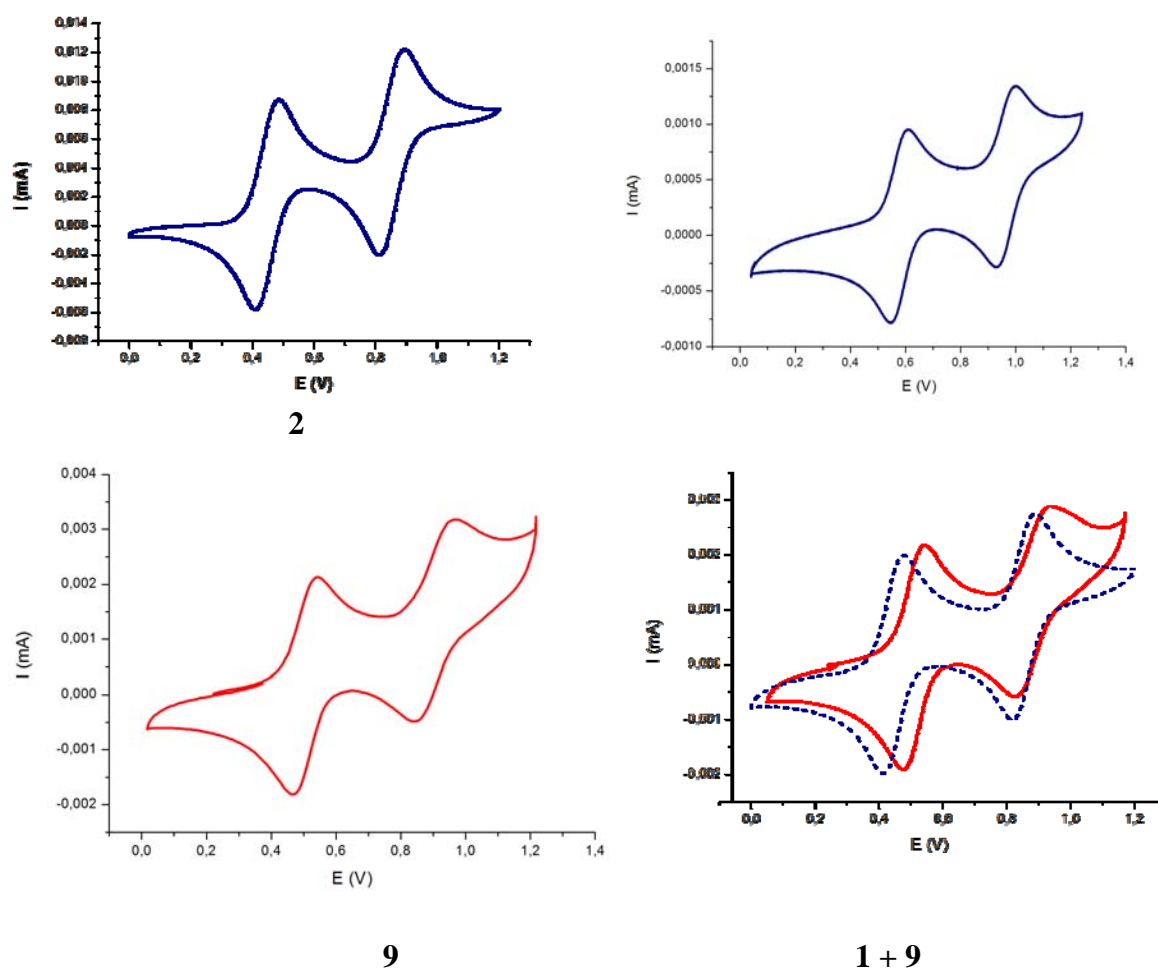

**Fig. S6** Cyclic voltammograms.

**Table S6.** Oxidation potentials from cyclic voltammetry data. Measurements have been performed in CH<sub>2</sub>Cl<sub>2</sub> in the presence of (*n*-Bu<sub>4</sub>N)PF<sub>6</sub> (0.1 M) at a scan rate of 0.1 V·s<sup>-1</sup>.

| compound | E <sup>1</sup> <sub>1/2</sub> (V) | E <sup>2</sup> <sub>1/2</sub> (V) |
|----------|-----------------------------------|-----------------------------------|
| <b>2</b> | 0.45                              | 0.85                              |
| <b>1</b> | 0.44                              | 0.85                              |
| <b>9</b> | 0.51                              | 0.91                              |
| <b>8</b> | 0.57                              | 0.96                              |

## UV-Vis spectra of CH<sub>2</sub>Cl<sub>2</sub> solutions

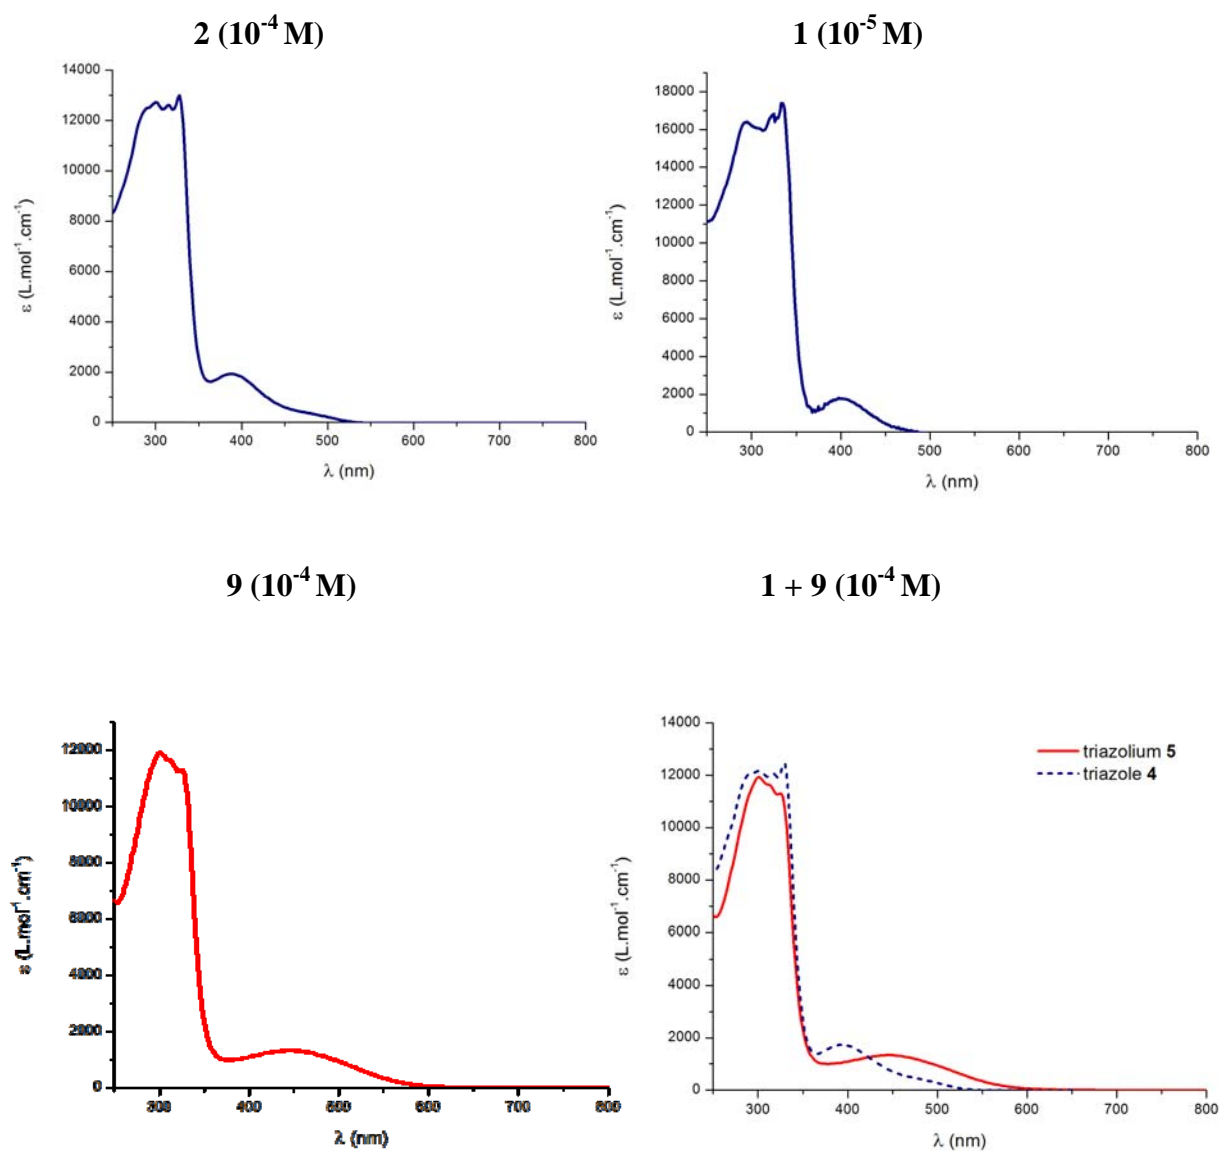

**Fig. S7** UV-Vis spectra.

**Table S7.** UV-Vis data.

| compound | $\lambda_{\text{max}}$ (nm) | $\epsilon$ ( $\text{L}\cdot\text{mol}^{-1}\cdot\text{cm}^{-1}$ ) |
|----------|-----------------------------|------------------------------------------------------------------|
| <b>2</b> | 388                         | 1967                                                             |
| <b>1</b> | 394                         | 1758                                                             |
| <b>9</b> | 451                         | 1343                                                             |



UV-Vis of **1** with  $\text{HBF}_4$  in  $\text{CH}_2\text{Cl}_2$  ( $10^{-4}$  M)

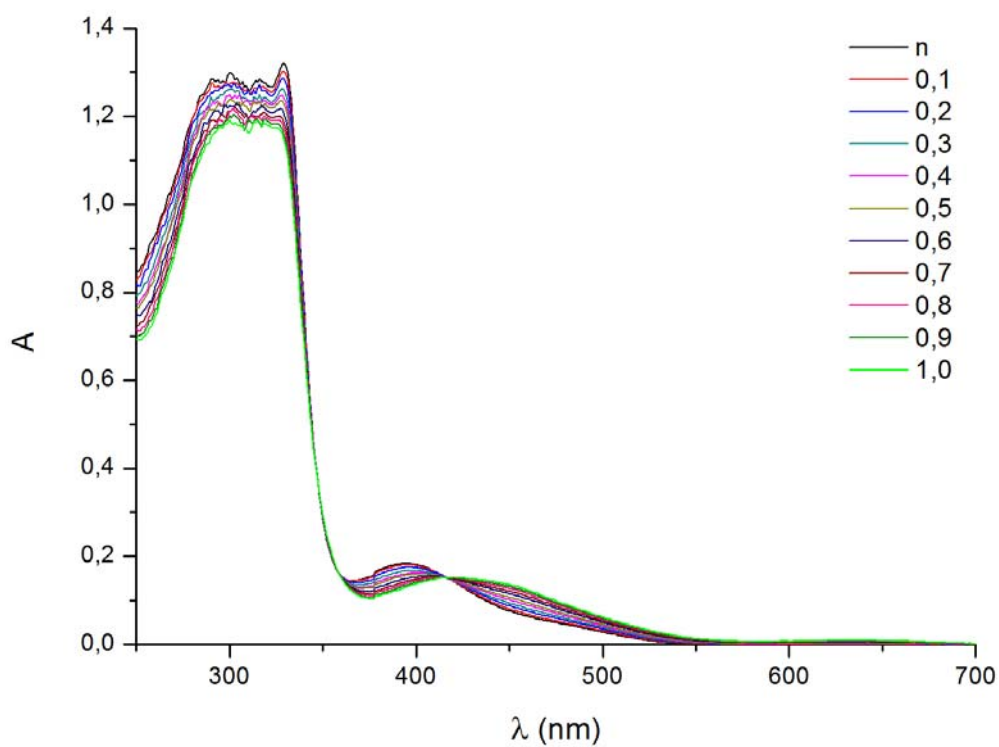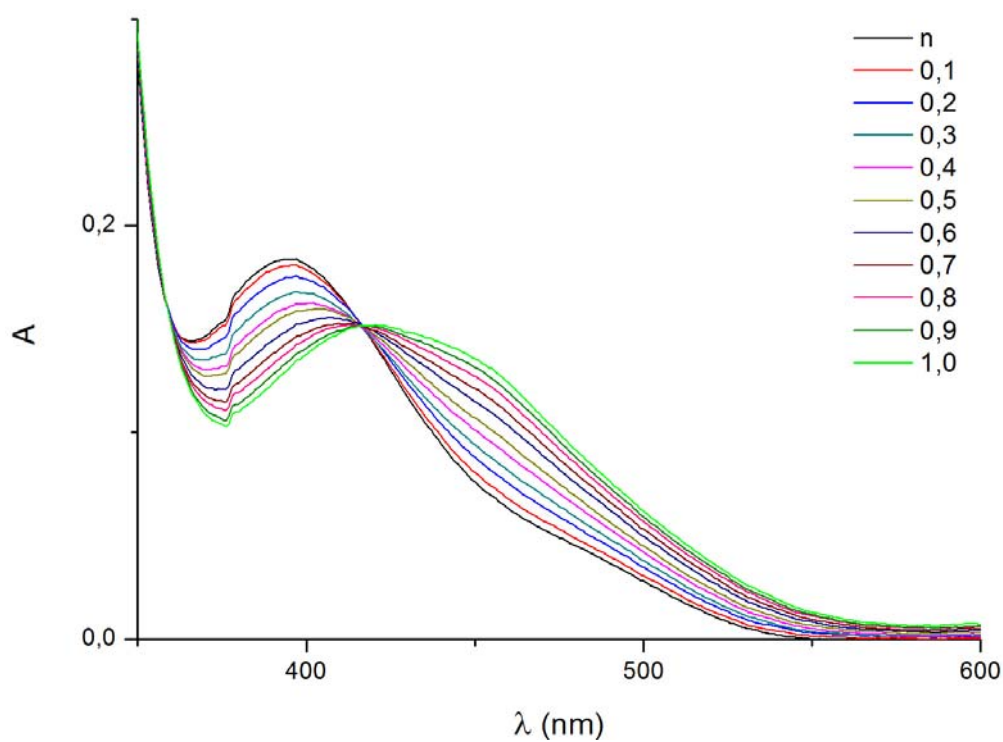

**Fig. S8** Acidic titration of **1**. Isosbestic points :  $\lambda = 358$  nm,  $A = 0.163$ ;  $\lambda = 416$  nm,  $A = 0.151$

UV-Vis of 8 with HBF<sub>4</sub> in CH<sub>2</sub>Cl<sub>2</sub> (10<sup>-4</sup> M)

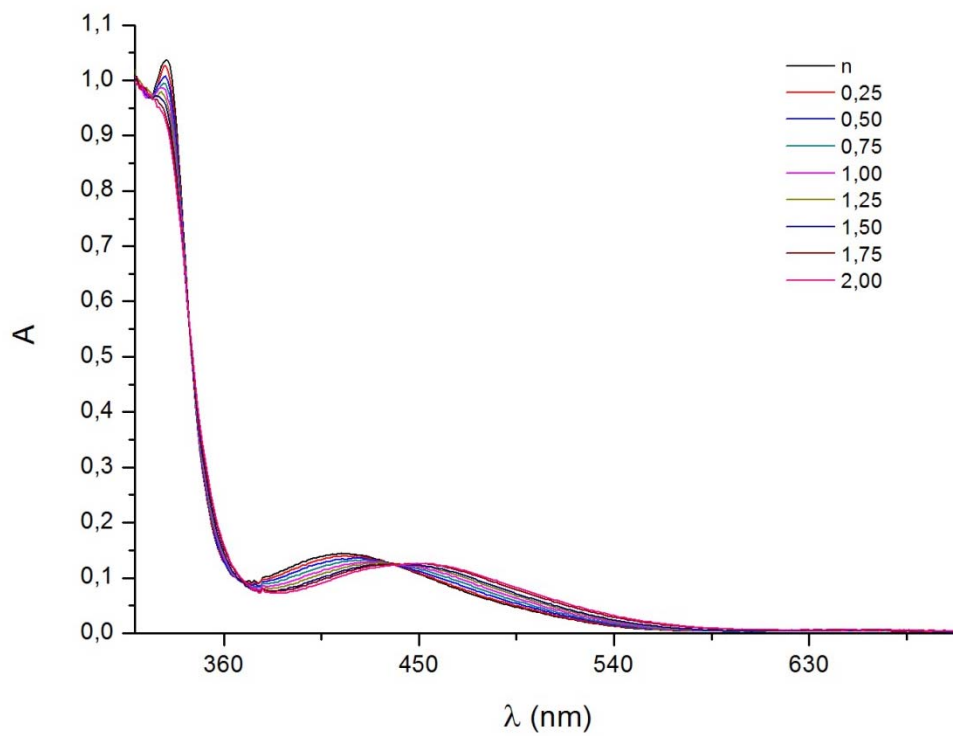

Zoom

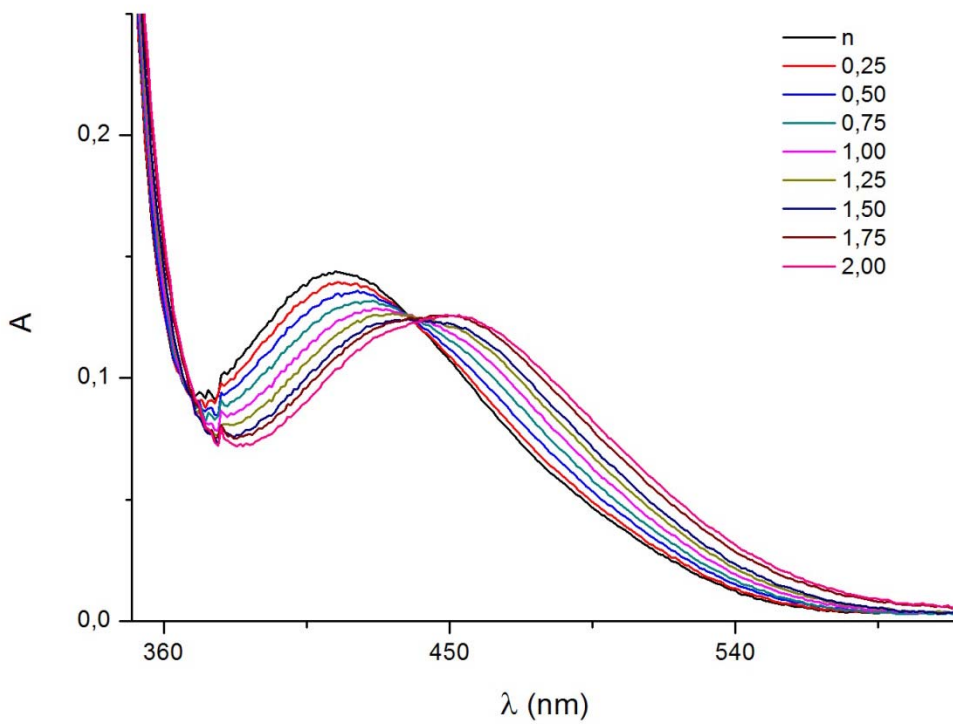

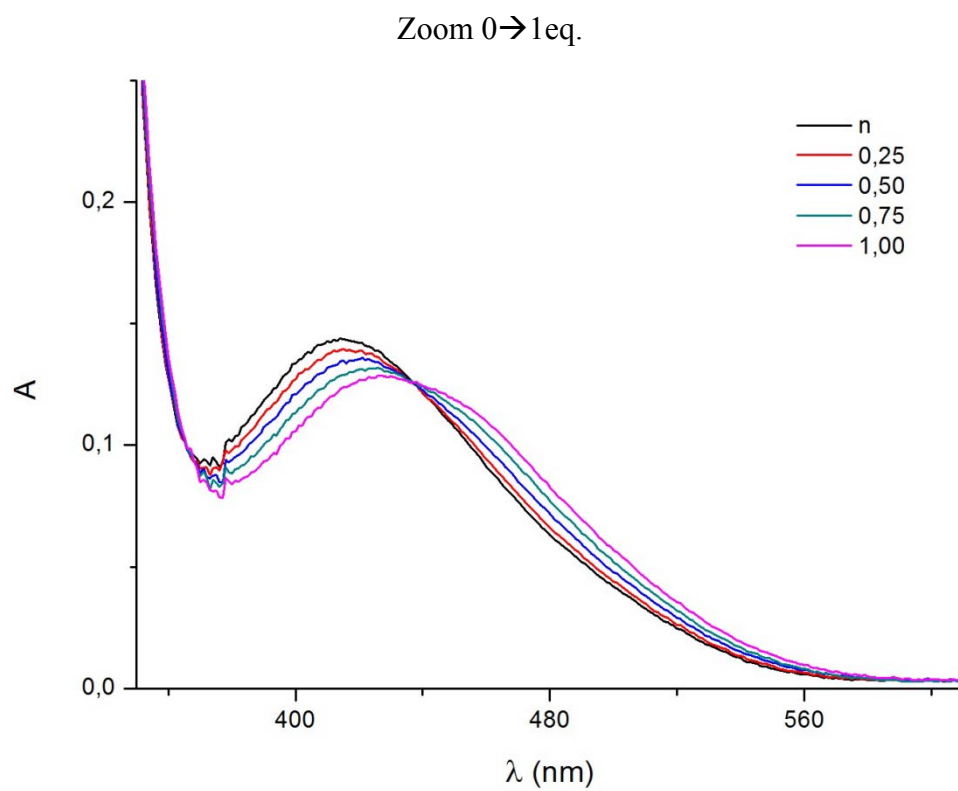

**Fig. S9** Acidic titration of **8**. Neutral :  $\lambda = 415$  nm,  $A = 0.143$ ,  $\epsilon = 1430$  L.mol<sup>-1</sup>.cm<sup>-1</sup>. Isosbestic points :  $\lambda = 437$  nm,  $A = 0.126$ ;  $\lambda = 442$  nm,  $A = 0.124$ .
